# Supplementary material for: Organic–inorganic hybrid: a novel template for synthesis of nanostructured Ag
Source: Royal Society of Chemistry journal article supplement (doi:10.1039/c3ra43378a), 2013-11-29
Supplement: c3ra43378a.pdf [file c3ra43378a.pdf]

# Organic-Inorganic Hybrid: A Novel Template for Synthesis of Nanostructured Ag

Debasmita Sardar,<sup>a</sup> Bappaditya Naskar,<sup>b</sup> Ambarish Sanyal,<sup>c</sup> S. P. Moulik<sup>b\*</sup> and Tanushree Bala<sup>a\*</sup>

## Supporting Information S-1

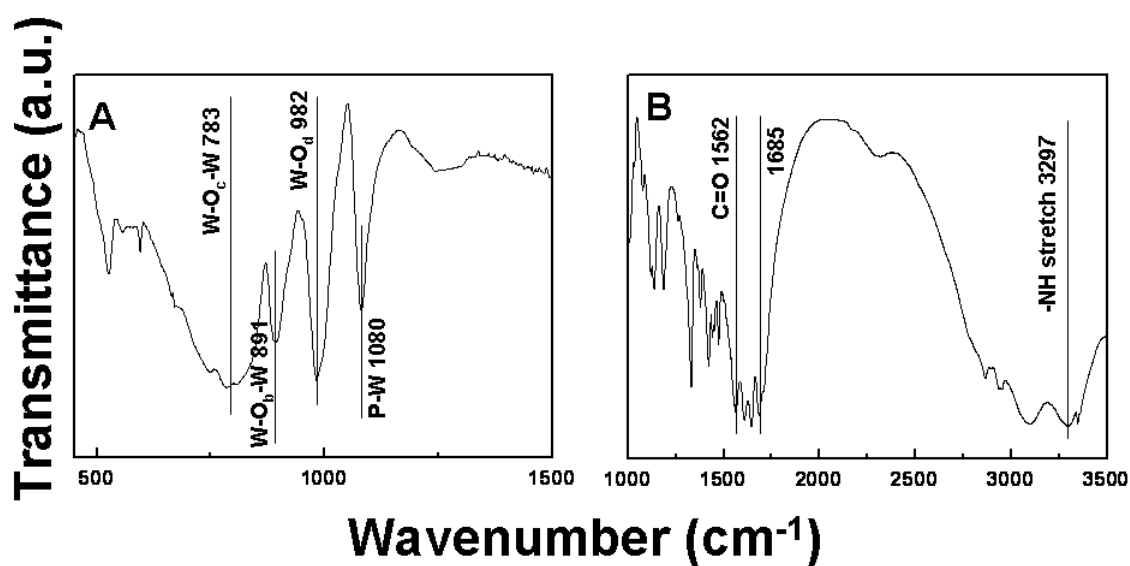

Figure S-1: FTIR spectra of pure phosphotungstic acid (A) and pure Arginine (B).

### Supporting Information S-2

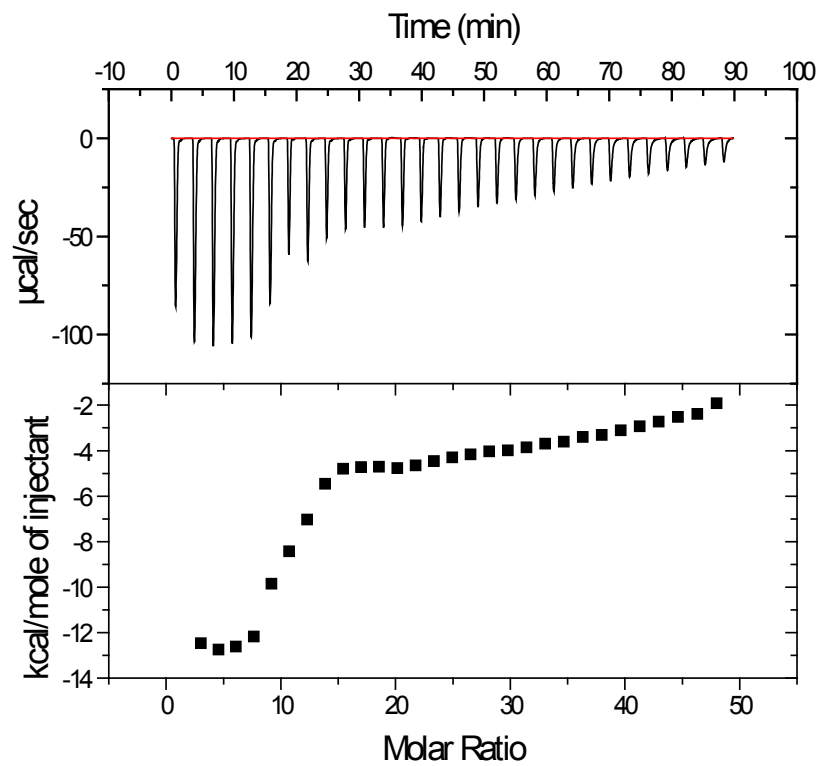

**Figure S-2:** Panel A: Raw data of ITC recorded during injection of arginine in 0.1 mM PTA at pH 3.5 at 303 K. Panel B: Binding isotherm obtained from integrated data of panel A plotted against molar ratio.

### Supporting Information S-3

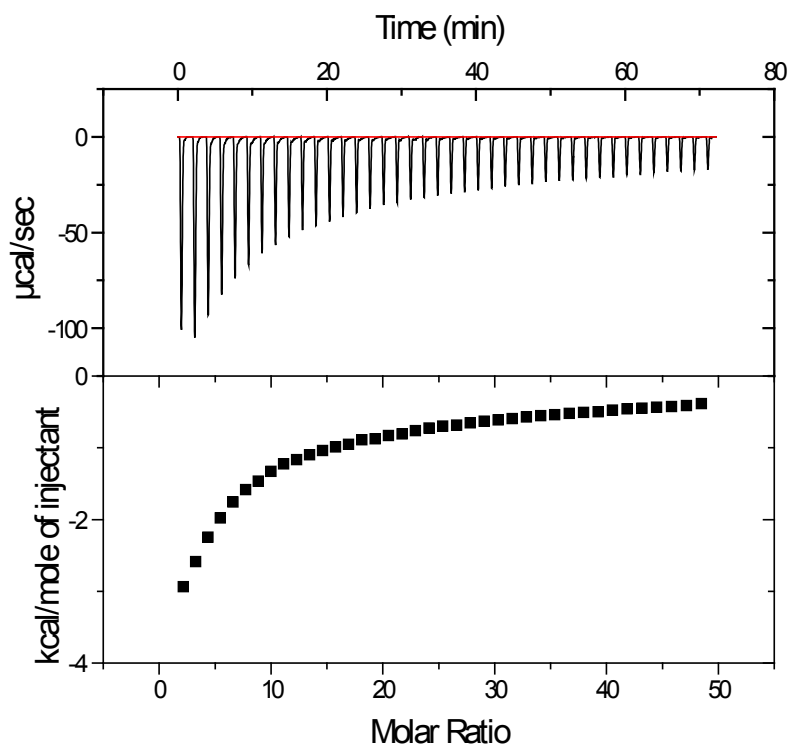

**Figure S-3:** Panel A: Raw data of ITC recorded during injection of arginine in 0.7 mM PTA at pH 7.0 at 303 K. Panel B: Binding isotherm obtained from integrated data of panel A plotted against molar ratio.

### Supporting Information S-4

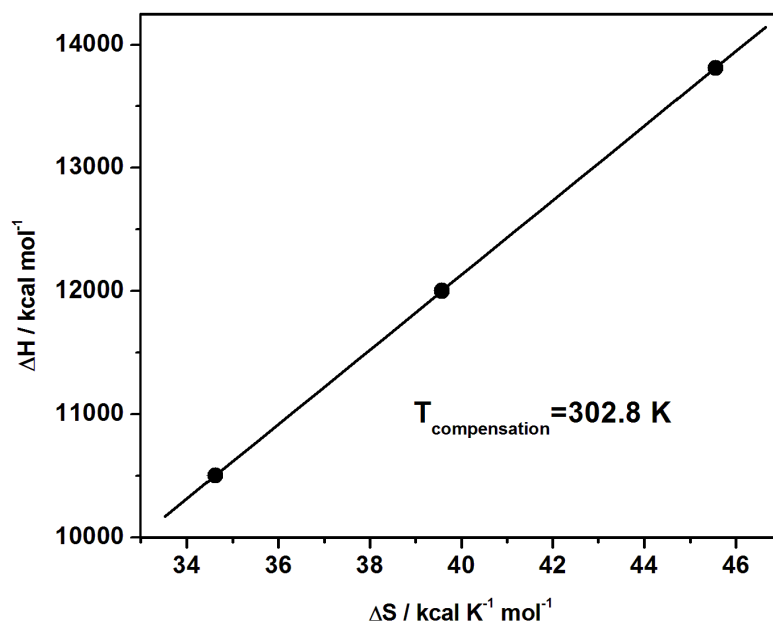

**Figure S-4:** Compensation plot between  $\Delta H$  and  $\Delta S$  presented in Table 3. Correlation coefficient =1;  $T_{\text{compensation}} (302.8 \text{ K}) = T_{\text{expt}} (303 \text{ K})$

### Supporting Information S-5

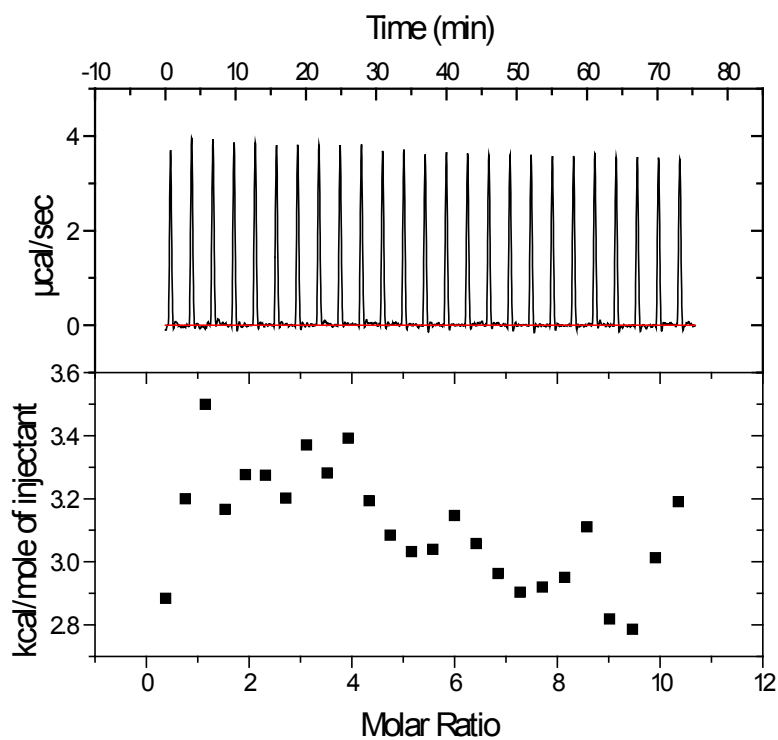

**Figure S-5: (Panel A)** Raw data of ITC recorded during injection of arginine in 0.04 mM PTA at pH 11.5 at 303 K. **(Panel B)** Binding isotherm obtained from integrated data of panel A plotted against molar ratio.
